# Supplementary material for: Association between Adequate Fruit and Vegetable Intake and CVDs-Associated Risk Factors among the Malaysian Adults: Findings from a Nationally Representative Cross-Sectional Study
Source: MDPI journal article supplement (doi:10.3390/ijerph19159173), 2022-07-27
Supplement: s1 [file s1]

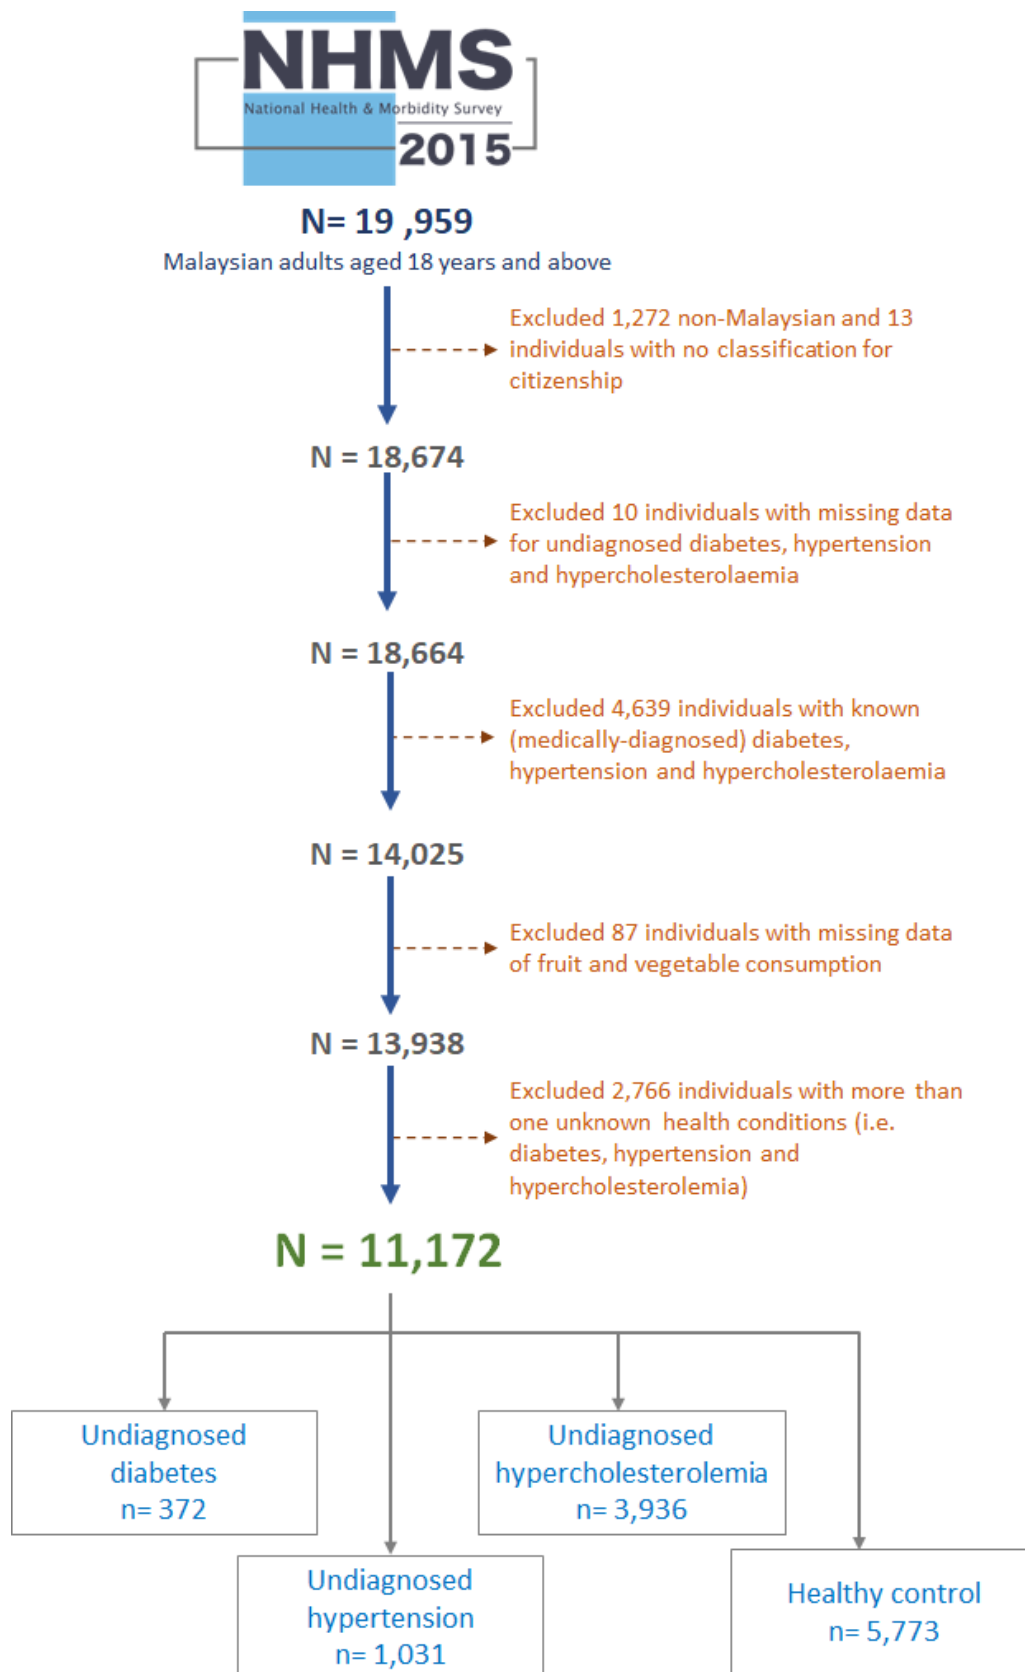

Figure S1. The selection of individuals for data analysis

Table S1. Association between adequacy of fruit intake ( $\geq 2$  servings per day) and risk of newly diagnosed diabetes mellitus, hypertension and hypercholesterolaemia in Malaysian adults aged 18 years old and above

| Variable                                                              | Undiagnosed diabetes<br>(n=432) |             | Undiagnosed hypertension<br>(n=1,031) |             | Undiagnosed hypercholesterolaemia<br>(n=3,936) |           |
|-----------------------------------------------------------------------|---------------------------------|-------------|---------------------------------------|-------------|------------------------------------------------|-----------|
|                                                                       | OR                              | 95% CI      | OR                                    | 95% CI      | OR                                             | 95% CI    |
| <b>Adjusted Analysis Model 1 (Adjusted for gender and age)</b>        |                                 |             |                                       |             |                                                |           |
| <b>Fruit intake</b>                                                   |                                 |             |                                       |             |                                                |           |
| Inadequate                                                            | 1.00                            |             | 1.00                                  |             | 1.00                                           |           |
| Adequate                                                              | 1.08                            | 0.68-1.71   | 0.86                                  | 0.63-1.18   | 0.88                                           | 0.73-1.06 |
| <b>Sex</b>                                                            |                                 |             |                                       |             |                                                |           |
| Male                                                                  | 1.00                            |             | 1.00                                  |             | 1.00                                           |           |
| Female                                                                | 0.77                            | 0.59-1.00   | 0.64                                  | 0.53-0.77   | 1.33                                           | 1.20-1.48 |
| <b>Age group (years old)</b>                                          |                                 |             |                                       |             |                                                |           |
| 18-29                                                                 | 1.00                            |             | 1.00                                  |             | 1.00                                           |           |
| 30-39                                                                 | 1.13                            | 0.79-1.61   | 1.87                                  | 1.44-2.44   | 1.97                                           | 1.72-2.26 |
| 40-49                                                                 | 1.54                            | 1.08-2.20   | 3.26                                  | 2.50-4.26   | 2.69                                           | 2.28-3.16 |
| 50-59                                                                 | 1.64                            | 1.04-2.59   | 4.10                                  | 3.02-5.57   | 3.31                                           | 2.78-3.94 |
| $\geq 60$                                                             | 2.12                            | 1.36-3.30   | 7.71                                  | 5.85-10.16  | 2.16                                           | 1.78-2.63 |
| <b>Adjusted Analysis Model 2 (Model 1 + Sociodemographic factors)</b> |                                 |             |                                       |             |                                                |           |
| <b>Fruit intake</b>                                                   |                                 |             |                                       |             |                                                |           |
| Inadequate                                                            | 1.00                            |             | 1.00                                  |             | 1.00                                           |           |
| Adequate                                                              | 1.11                            | 0.71-1.74   | 0.92                                  | 0.67 - 1.26 | 0.90                                           | 0.75-1.09 |
| <b>Sex</b>                                                            |                                 |             |                                       |             |                                                |           |
| Male                                                                  | 1.00                            |             | 1.00                                  |             | 1.00                                           |           |
| Female                                                                | 0.78                            | 0.59 - 1.04 | 0.64                                  | 0.52 - 0.77 | 1.33                                           | 1.19-1.49 |
| <b>Age group (years)</b>                                              |                                 |             |                                       |             |                                                |           |
| 18-29                                                                 | 1.00                            |             | 1.00                                  |             | 1.00                                           |           |
| 30-39                                                                 | 1.18                            | 0.8 - 1.76  | 1.99                                  | 1.5 - 2.63  | 1.93                                           | 1.65-2.27 |
| 40-49                                                                 | 1.66                            | 1.11 - 2.49 | 3.39                                  | 2.52 - 4.57 | 2.63                                           | 2.18-3.18 |
| 50-59                                                                 | 1.49                            | 0.89 - 2.48 | 3.79                                  | 2.63 - 5.45 | 3.14                                           | 2.54-3.88 |
| $\geq 60$                                                             | 1.62                            | 0.9 - 2.92  | 6.07                                  | 4.23 - 8.73 | 1.99                                           | 1.53-2.58 |
| <b>Ethnicity</b>                                                      |                                 |             |                                       |             |                                                |           |
| Malay                                                                 | 1.00                            |             | 1.00                                  |             | 1.00                                           |           |
| Chinese                                                               | 0.55                            | 0.36 - 0.84 | 0.79                                  | 0.60 - 1.05 | 0.77                                           | 0.64-0.93 |
| Indian                                                                | 1.65                            | 0.99 - 2.76 | 0.88                                  | 0.58 - 1.33 | 0.91                                           | 0.71-1.17 |
| Other Bumiputera                                                      | 1.16                            | 0.77 - 1.76 | 1.17                                  | 0.85 - 1.60 | 0.88                                           | 0.70-1.09 |

| Variable                                                       | Undiagnosed diabetes<br>(n=432) |             | Undiagnosed hypertension<br>(n=1,031) |             | Undiagnosed hypercholesterolaemia<br>(n=3,936) |           |
|----------------------------------------------------------------|---------------------------------|-------------|---------------------------------------|-------------|------------------------------------------------|-----------|
|                                                                | OR                              | 95% CI      | OR                                    | 95% CI      | OR                                             | 95% CI    |
| Others                                                         | 2.54                            | 1.07 - 6.04 | 1.11                                  | 0.47 - 2.62 | 1.01                                           | 0.63-1.61 |
| <b>Residential area</b>                                        |                                 |             |                                       |             |                                                |           |
| Urban                                                          | 1.00                            |             | 1.00                                  |             | 1.00                                           |           |
| Rural                                                          | 0.88                            | 0.62 - 1.24 | 1.07                                  | 0.86 - 1.33 | 0.97                                           | 0.84-1.12 |
| <b>Marital status</b>                                          |                                 |             |                                       |             |                                                |           |
| Single                                                         | 1.00                            |             | 1.00                                  |             | 1.00                                           |           |
| Married                                                        | 0.95                            | 0.67 - 1.34 | 0.97                                  | 0.75 - 1.26 | 0.97                                           | 0.84-1.12 |
| Widow/ widower/ divorcee                                       | 1.02                            | 0.49 - 2.09 | 1.16                                  | 0.77 - 1.75 | 0.97                                           | 0.84-1.12 |
| No formal education                                            | 1.00                            |             | 1.00                                  |             | 1.00                                           |           |
| Primary                                                        | 0.63                            | 0.32 - 1.23 | 0.97                                  | 0.75 - 1.26 | 1.11                                           | 0.78-1.58 |
| Secondary                                                      | 0.46                            | 0.24 - 0.88 | 1.16                                  | 0.77 - 1.75 | 0.96                                           | 0.67-1.37 |
| Tertiary                                                       | 0.34                            | 0.17 - 0.67 | 0.97                                  | 0.75 - 1.26 | 0.92                                           | 0.64-1.33 |
| <b>Monthly household income</b>                                |                                 |             |                                       |             |                                                |           |
| B40                                                            | 1.00                            |             | 1.00                                  |             | 1.00                                           |           |
| M40                                                            | 0.74                            | 0.51 - 1.09 | 0.80                                  | 0.62 - 1.04 | 0.99                                           | 0.85-1.14 |
| T20                                                            | 0.50                            | 0.22 - 1.15 | 0.87                                  | 0.54 - 1.42 | 1.04                                           | 0.79-1.36 |
| <b>Adjusted Analysis Model 3 (Model 2 + lifestyle factors)</b> |                                 |             |                                       |             |                                                |           |
| <b>Fruit intake</b>                                            |                                 |             |                                       |             |                                                |           |
| Inadequate                                                     | 1.00                            |             | 1.00                                  |             | 1.00                                           |           |
| Adequate                                                       | 1.11                            | 0.69-1.79   | 0.77                                  | 0.54-1.10   | 0.89                                           | 0.73-1.09 |
| <b>Sex</b>                                                     |                                 |             |                                       |             |                                                |           |
| Male                                                           | 1.00                            |             | 1.00                                  |             | 1.00                                           |           |
| Female                                                         | 0.79                            | 0.55-1.12   | 0.49                                  | 0.38-0.62   | 1.44                                           | 1.26-1.64 |
| <b>Age group (years)</b>                                       |                                 |             |                                       |             |                                                |           |
| 18-29                                                          | 1.00                            |             | 1.00                                  |             | 1.00                                           |           |
| 30-39                                                          | 1.09                            | 0.72-1.66   | 2.03                                  | 1.50-2.75   | 1.91                                           | 1.61-2.26 |
| 40-49                                                          | 1.44                            | 0.95-2.19   | 3.03                                  | 2.19-4.18   | 2.34                                           | 1.92-2.87 |
| 50-59                                                          | 1.24                            | 0.75-2.05   | 3.86                                  | 2.58-5.76   | 3.16                                           | 2.53-3.93 |
| ≥60                                                            | 1.62                            | 0.88-2.98   | 6.08                                  | 4.06-9.09   | 2.09                                           | 1.59-2.76 |
| <b>Ethnicity</b>                                               |                                 |             |                                       |             |                                                |           |
| Malay                                                          | 1.00                            |             | 1.00                                  |             | 1.00                                           |           |
| Chinese                                                        | 0.55                            | 0.35-0.86   | 0.87                                  | 0.63-1.2    | 0.83                                           | 0.68-1.01 |
| Indian                                                         | 1.49                            | 0.86-2.6    | 0.65                                  | 0.41-1.03   | 0.79                                           | 0.61-1.03 |

| Variable                        | Undiagnosed diabetes<br>(n=432) |           | Undiagnosed hypertension<br>(n=1,031) |           | Undiagnosed hypercholesterolaemia<br>(n=3,936) |           |
|---------------------------------|---------------------------------|-----------|---------------------------------------|-----------|------------------------------------------------|-----------|
|                                 | OR                              | 95% CI    | OR                                    | 95% CI    | OR                                             | 95% CI    |
| Other Bumiputera                | 0.96                            | 0.61-1.51 | 1.04                                  | 0.75-1.45 | 0.77                                           | 0.61-0.98 |
| Others                          | 2.13                            | 0.79-5.77 | 1.18                                  | 0.48-2.88 | 0.94                                           | 0.58-1.52 |
| <b>Residential area</b>         |                                 |           |                                       |           |                                                |           |
| Urban                           | 1.00                            |           | 1.00                                  |           | 1.00                                           |           |
| Rural                           | 0.87                            | 0.61-1.23 | 1.10                                  | 0.87-1.39 | 0.93                                           | 0.8-1.09  |
| <b>Marital status</b>           |                                 |           |                                       |           |                                                |           |
| Single                          | 1.00                            |           | 1.00                                  |           | 1.00                                           |           |
| Married                         | 1.06                            | 0.74-1.52 | 0.84                                  | 0.63-1.12 | 1.11                                           | 0.94-1.3  |
| Widow/ widower/ divorcee        | 1.34                            | 0.65-2.73 | 1.18                                  | 0.75-1.86 | 1.14                                           | 0.85-1.53 |
| <b>Education level</b>          |                                 |           |                                       |           |                                                |           |
| No formal education             | 1.00                            |           | 1.00                                  |           | 1.00                                           |           |
| Primary                         | 0.51                            | 0.26-0.99 | 1.01                                  | 0.64-1.59 | 0.98                                           | 0.67-1.43 |
| Secondary                       | 0.37                            | 0.19-0.71 | 0.69                                  | 0.43-1.09 | 0.84                                           | 0.57-1.24 |
| Tertiary                        | 0.29                            | 0.14-0.58 | 0.55                                  | 0.34-0.90 | 0.82                                           | 0.55-1.23 |
| <b>Monthly household income</b> |                                 |           |                                       |           |                                                |           |
| B40                             | 1.00                            |           | 1.00                                  |           | 1.00                                           |           |
| M40                             | 0.77                            | 0.52-1.14 | 0.72                                  | 0.55-0.94 | 0.97                                           | 0.83-1.13 |
| T20                             | 0.53                            | 0.23-1.22 | 0.74                                  | 0.44-1.25 | 1.03                                           | 0.78-1.36 |
| <b>Obesity</b>                  |                                 |           |                                       |           |                                                |           |
| Normal                          | 1.00                            |           | 1.00                                  |           | 1.00                                           |           |
| Obese                           | 1.25                            | 0.93-1.68 | 2.75                                  | 2.20-3.44 | 1.39                                           | 1.23-1.56 |
| <b>Alcohol intake</b>           |                                 |           |                                       |           |                                                |           |
| Never                           | 1.00                            |           | 1.00                                  |           | 1.00                                           |           |
| Ever                            | 0.98                            | 0.59-1.65 | 1.09                                  | 0.78-1.50 | 1.09                                           | 0.88-1.34 |
| <b>Smoking</b>                  |                                 |           |                                       |           |                                                |           |
| Never                           | 1.00                            |           | 1.00                                  |           | 1.00                                           |           |
| Current                         | 1.07                            | 0.73-1.56 | 0.67                                  | 0.52-0.86 | 1.09                                           | 0.92-1.28 |
| Former                          | 0.26                            | 0.06-1.20 | 0.85                                  | 0.43-1.67 | 0.78                                           | 0.48-1.25 |
| <b>Physical activity</b>        |                                 |           |                                       |           |                                                |           |
| Inactive                        | 1.00                            |           | 1.00                                  |           | 1.00                                           |           |
| Active                          | 1.21                            | 0.90-1.63 | 1.06                                  | 0.86-1.3  | 1.12                                           | 0.99-1.28 |

OR: odds ratio; 95% CI: 95% confidence interval; DM: undiagnosed diabetes; HTN: undiagnosed hypertension; HCL: undiagnosed hypercholesterolaemia; Model 1: adjusted for sex and age; Model 2: Model 1 + socio-demographic variables (ethnicity, residential area, marital status, educational level, household monthly income); Model 3 : Model 2 + lifestyle factors (BMI status, obesity, alcohol consumption, smoking, physical activity)
